# Supplementary material for: Polygenic risk alters the penetrance of monogenic kidney disease
Source: Springer Nature journal article supplement (doi:10.1038/s41467-023-43878-9), 2023-12-14
Supplement: MOESM1 [file 41467_2023_43878_MOESM1_ESM.pdf]

# Polygenic risk alters the penetrance of monogenic kidney disease

## Supplementary Information

### Contents

#### Supplementary Figures

|                             |    |
|-----------------------------|----|
| Supplementary Figure 1..... | 02 |
| Supplementary Figure 2..... | 03 |
| Supplementary Figure 3..... | 04 |
| Supplementary Figure 4..... | 05 |
| Supplementary Figure 5..... | 06 |
| Supplementary Figure 6..... | 07 |
| Supplementary Figure 7..... | 08 |

#### Supplementary Tables

|                              |    |
|------------------------------|----|
| Supplementary Table 1 .....  | 09 |
| Supplementary Table 2 .....  | 10 |
| Supplementary Table 3 .....  | 11 |
| Supplementary Table 4 .....  | 12 |
| Supplementary Table 5 .....  | 13 |
| Supplementary Table 6 .....  | 14 |
| Supplementary Table 7 .....  | 15 |
| Supplementary Table 8 .....  | 16 |
| Supplementary Table 9 .....  | 17 |
| Supplementary Table 10 ..... | 18 |
| Supplementary Table 11 ..... | 19 |
| Supplementary Table 12 ..... | 20 |
| Supplementary Table 13 ..... | 21 |
| Supplementary Table 14 ..... | 22 |

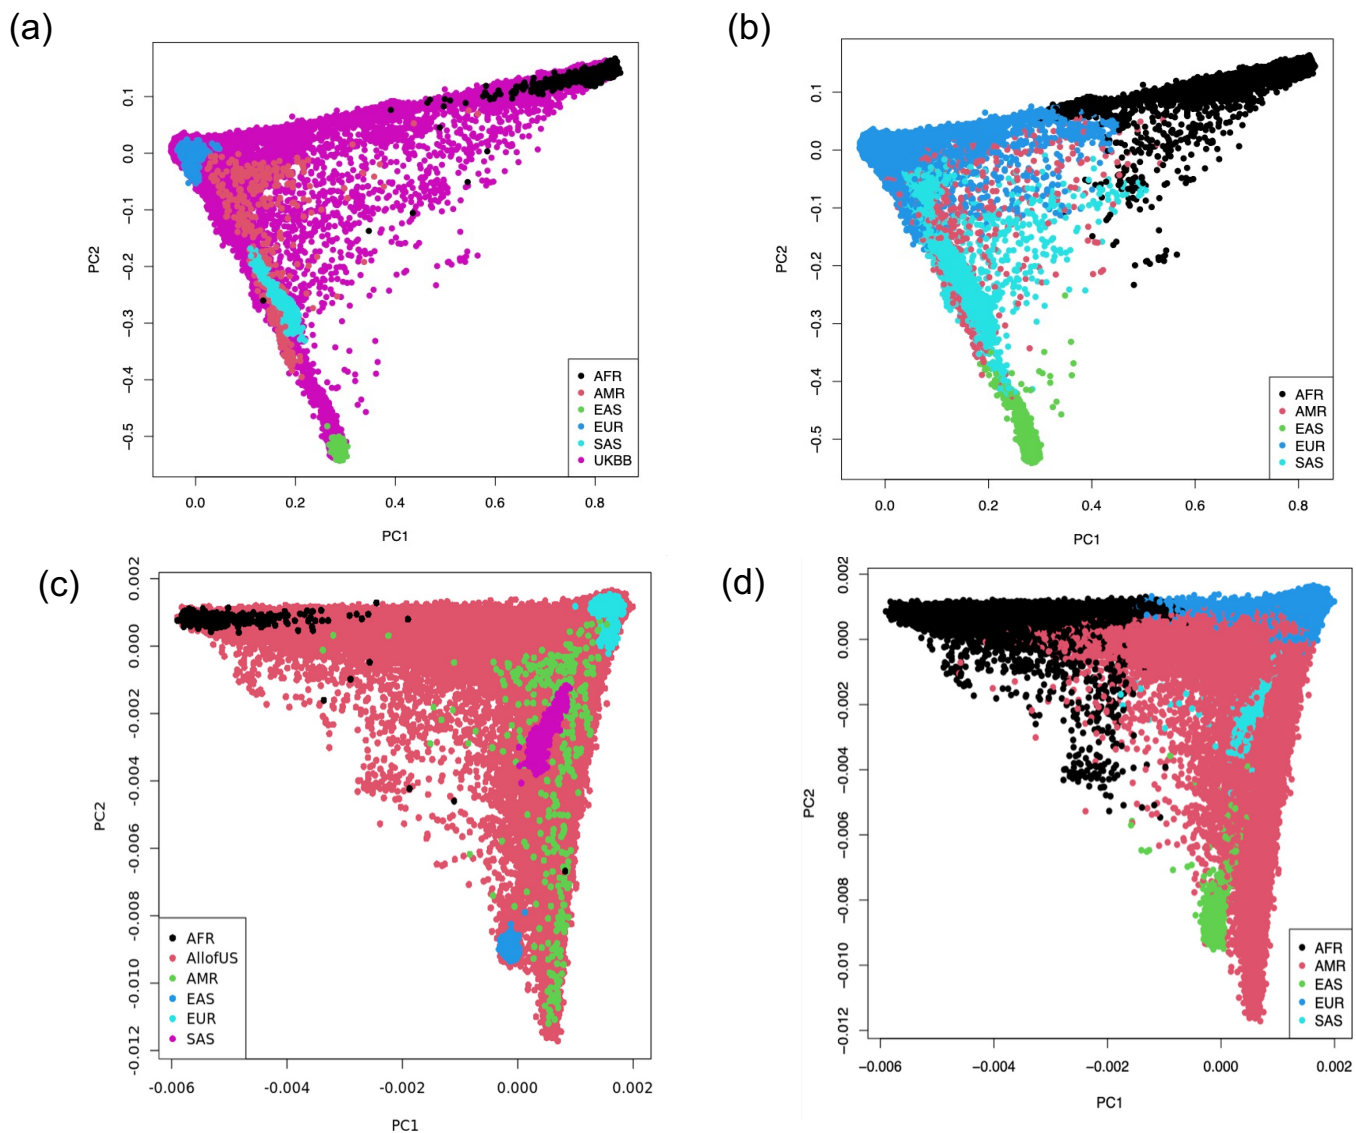

Supplementary Figure 1. PCA projections of the study participants from the UKBB (top) and AoU (bottom) against the 1000 G reference populations: (a) UKBB (N = 460,360) and (c) AoU (N = 165,208) participants plotted against the reference 1000 G populations (N = 2,504), (b) machine learning-assigned ancestry for the UKBB and (d) the AoU datasets. X-axis: PC1; Y-axis: PC2; AFR: African; AMR: Admixed American; EAS: East Asian; EUR: European; and SAS: South Asian.

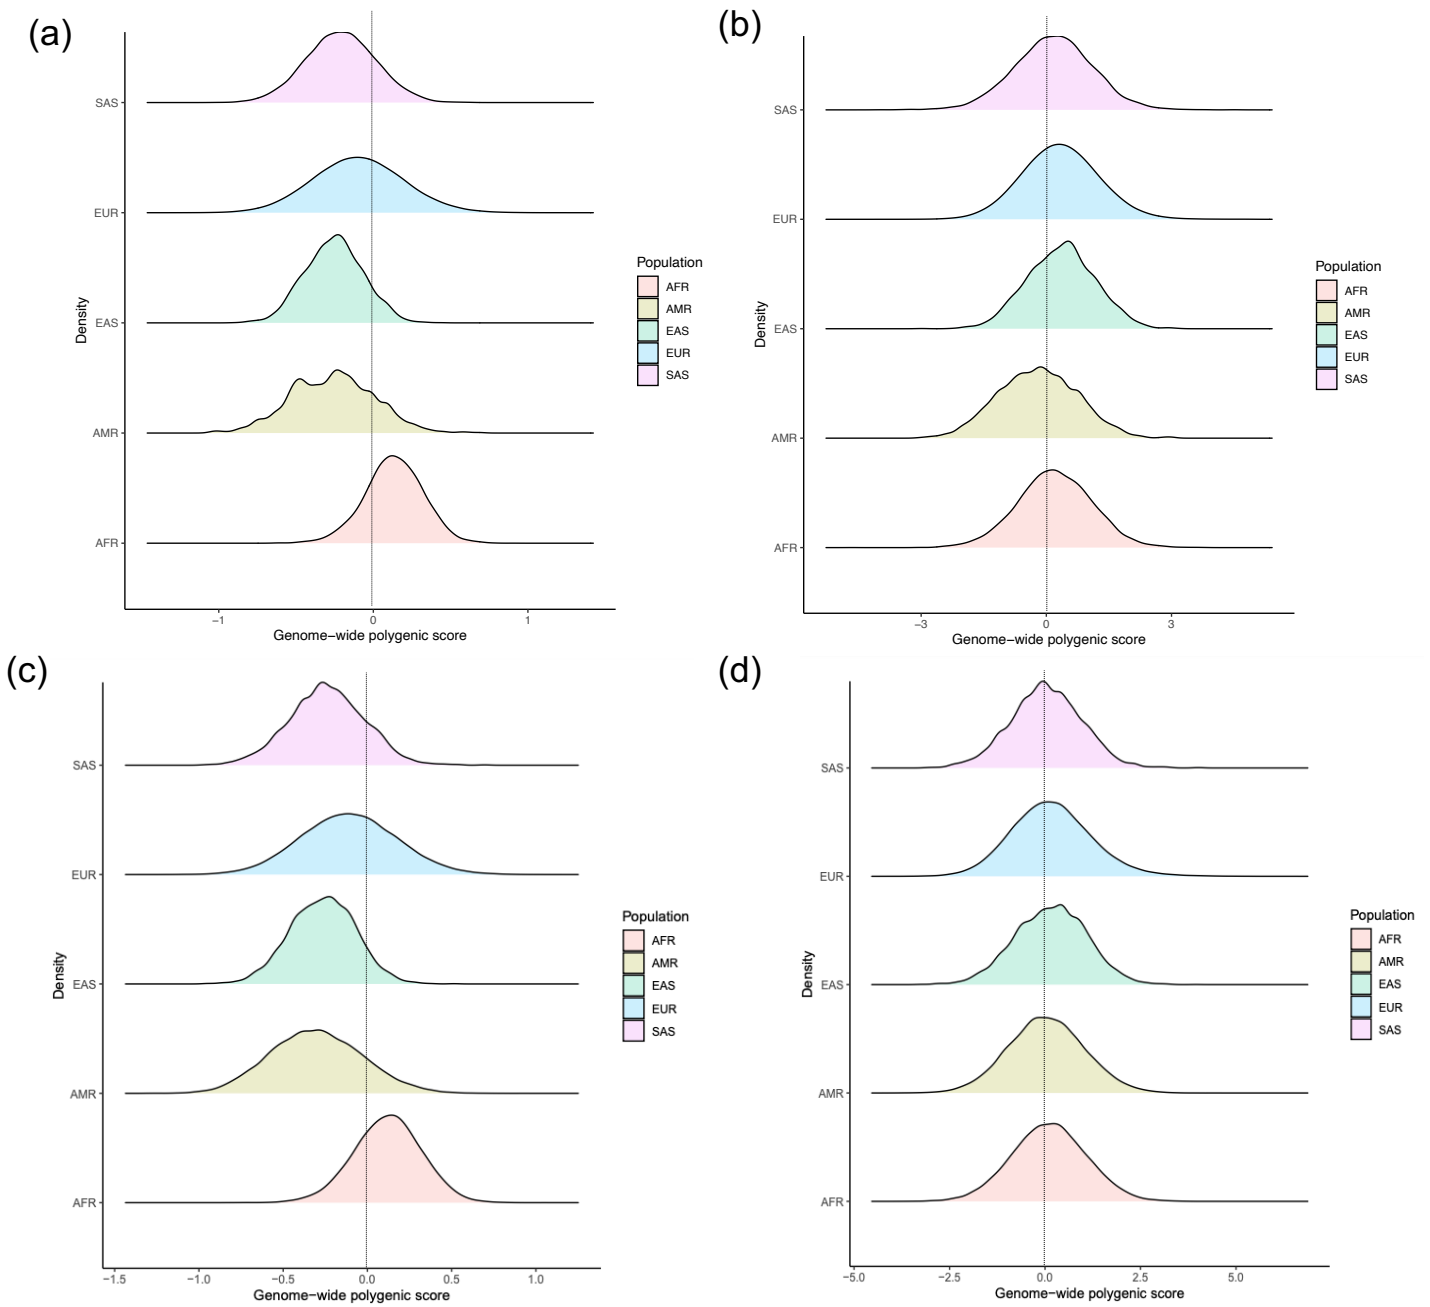

Supplementary Figure 2. Genome-wide Polygenic Score (GPS) distributions by ancestry in the UKBB and AoU datasets: (a) unadjusted and (b) ancestry-adjusted GPS in UKBB (N = 460,360); (c) unadjusted and (d) ancestry-adjusted GPS in AoU (N = 165,208). EUR: European, AFR: African, AMR: Admixed American, EAS: East Asian, and SAS: South Asian.

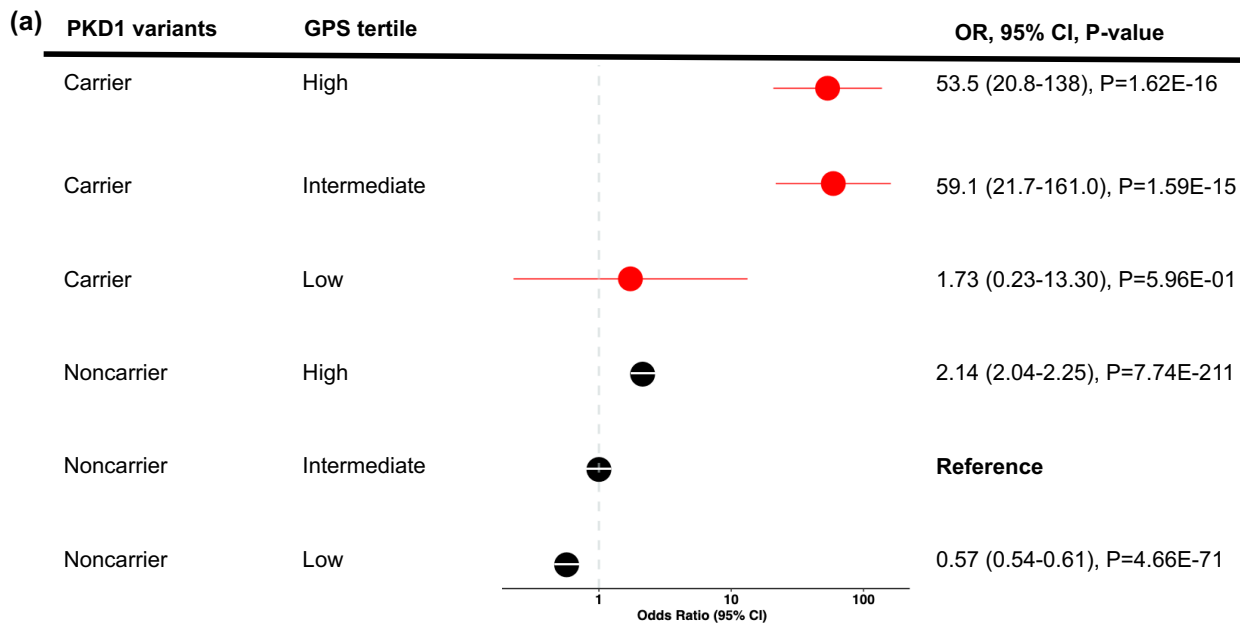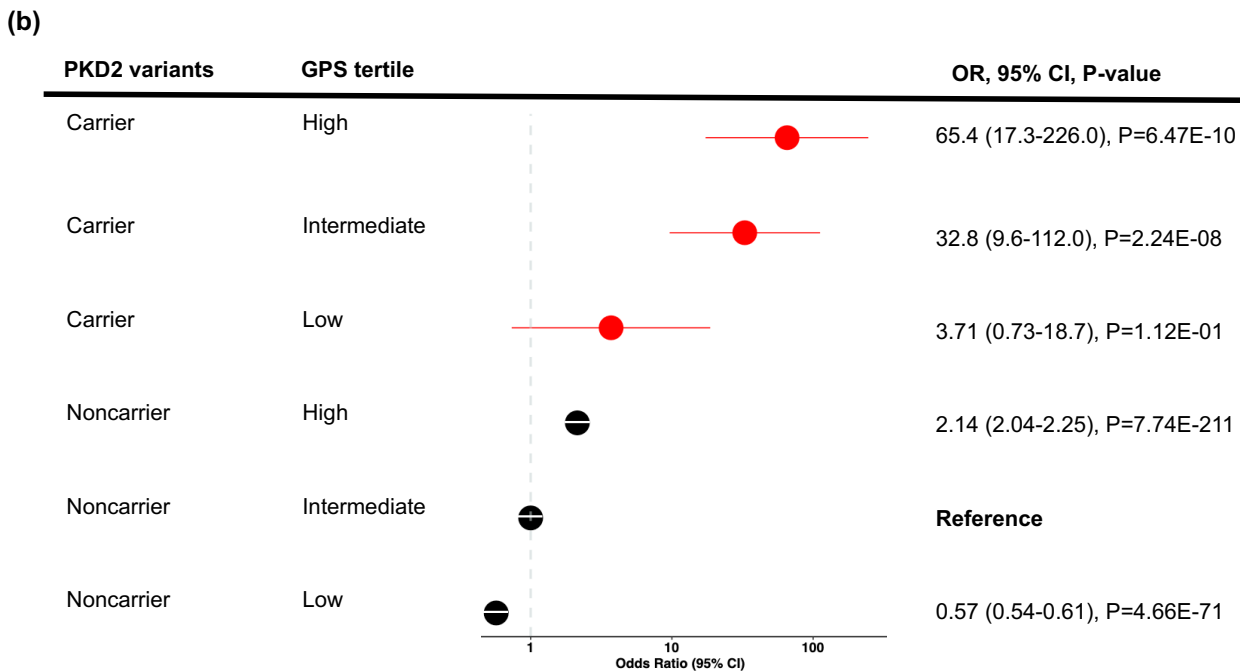

Supplementary Figure 3. Polygenic effects on the risk of CKD in M1 variant carriers for (a) *PKD1* ( $N_{\text{total}}=109$ ) and (b) *PKD2* ( $N_{\text{total}}=63$ ) genes analyzed individually. Each polygenic risk score tertile for carriers was compared to the middle tertile of non-carriers (average population risk). The X-axis shows Odds Ratios (OR), and the dotted vertical line corresponds to the OR=1.0 (no change in risk compared to the reference). The circles correspond to estimated ORs, and the horizontal lines around the circles indicate the 95% confidence intervals (95% CIs). The ORs were estimated using logistic regression model adjusted for age, sex, batch, and ancestry; these estimates were meta-analyzed between AoU and UKBB datasets using fixed effects meta-analysis. Two-sided P-values were derived from fixed effects meta-analysis and were not adjusted for multiple testing.

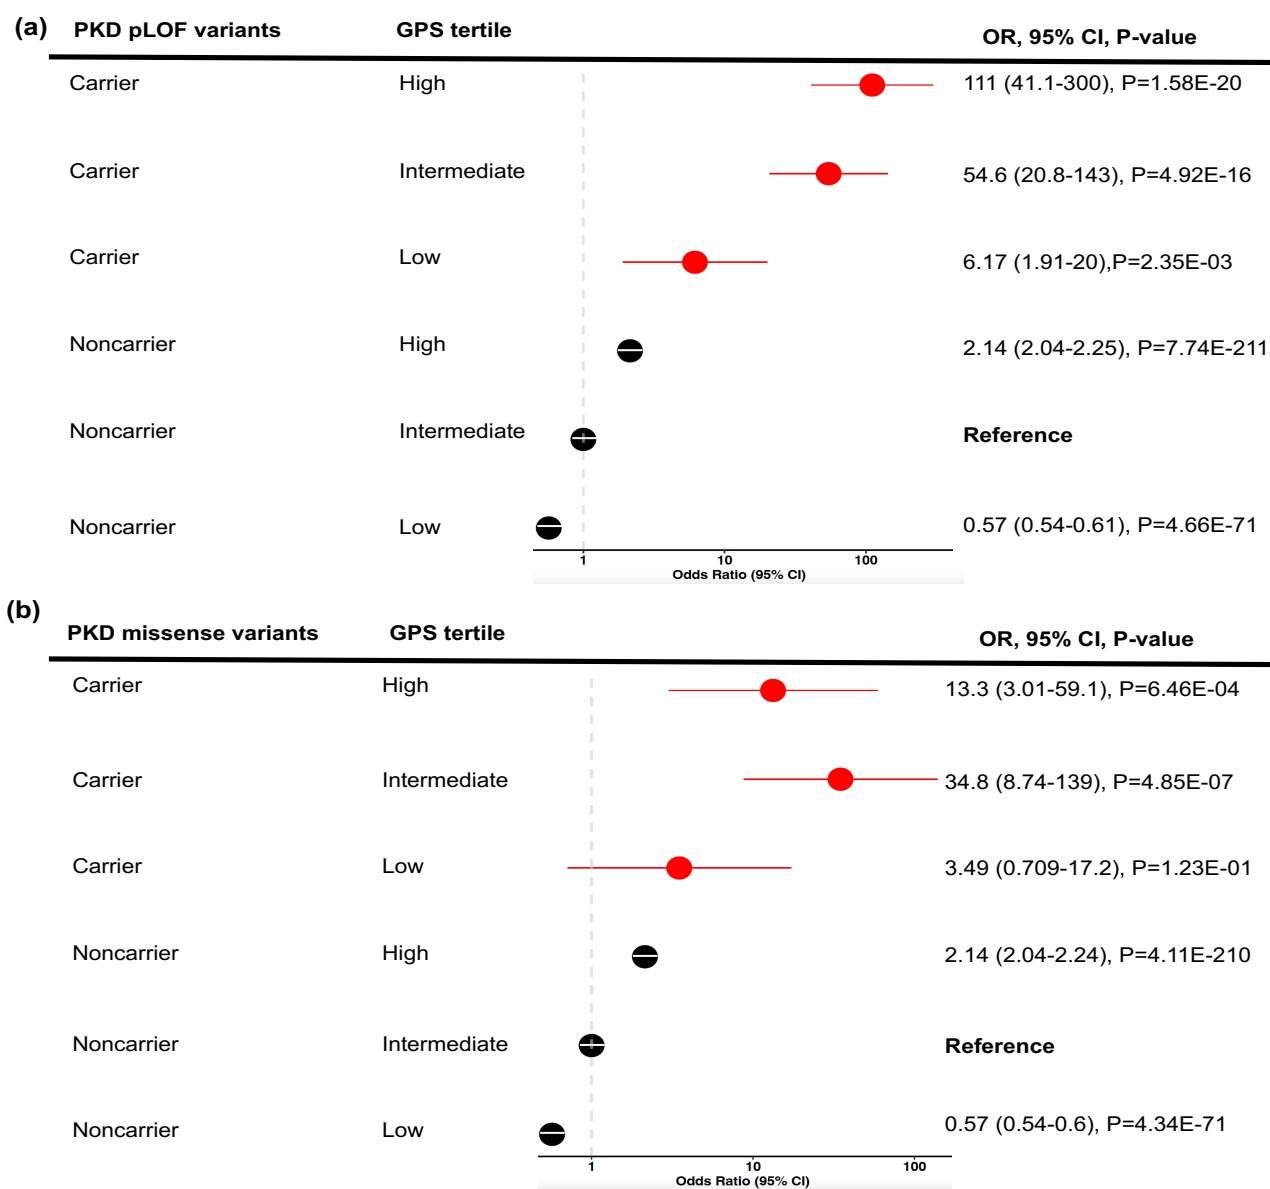

Supplementary Figure 4. Polygenic effects on the risk of CKD in M1 variant carriers for (a) ADPKD pLOF variants ( $N_{\text{total}}=111$ ) and (b) ADPKD missense variants ( $N_{\text{total}}=47$ ) were analyzed individually. Each polygenic risk score tertile for carriers was compared to the middle tertile of non-carriers (average population risk). The X-axis shows Odds Ratios (OR), and the dotted vertical line corresponds to the OR=1.0 (no change in risk compared to the reference). The circles correspond to estimated ORs, and the horizontal lines around the circles indicate the 95% confidence intervals (95% CIs). The ORs were estimated using logistic regression model adjusted for age, sex, batch, and ancestry; these estimates were meta-analyzed between AoU and UKBB datasets using fixed effects meta-analysis. Two-sided P-values were derived from fixed effects meta-analysis and were not adjusted for multiple testing.

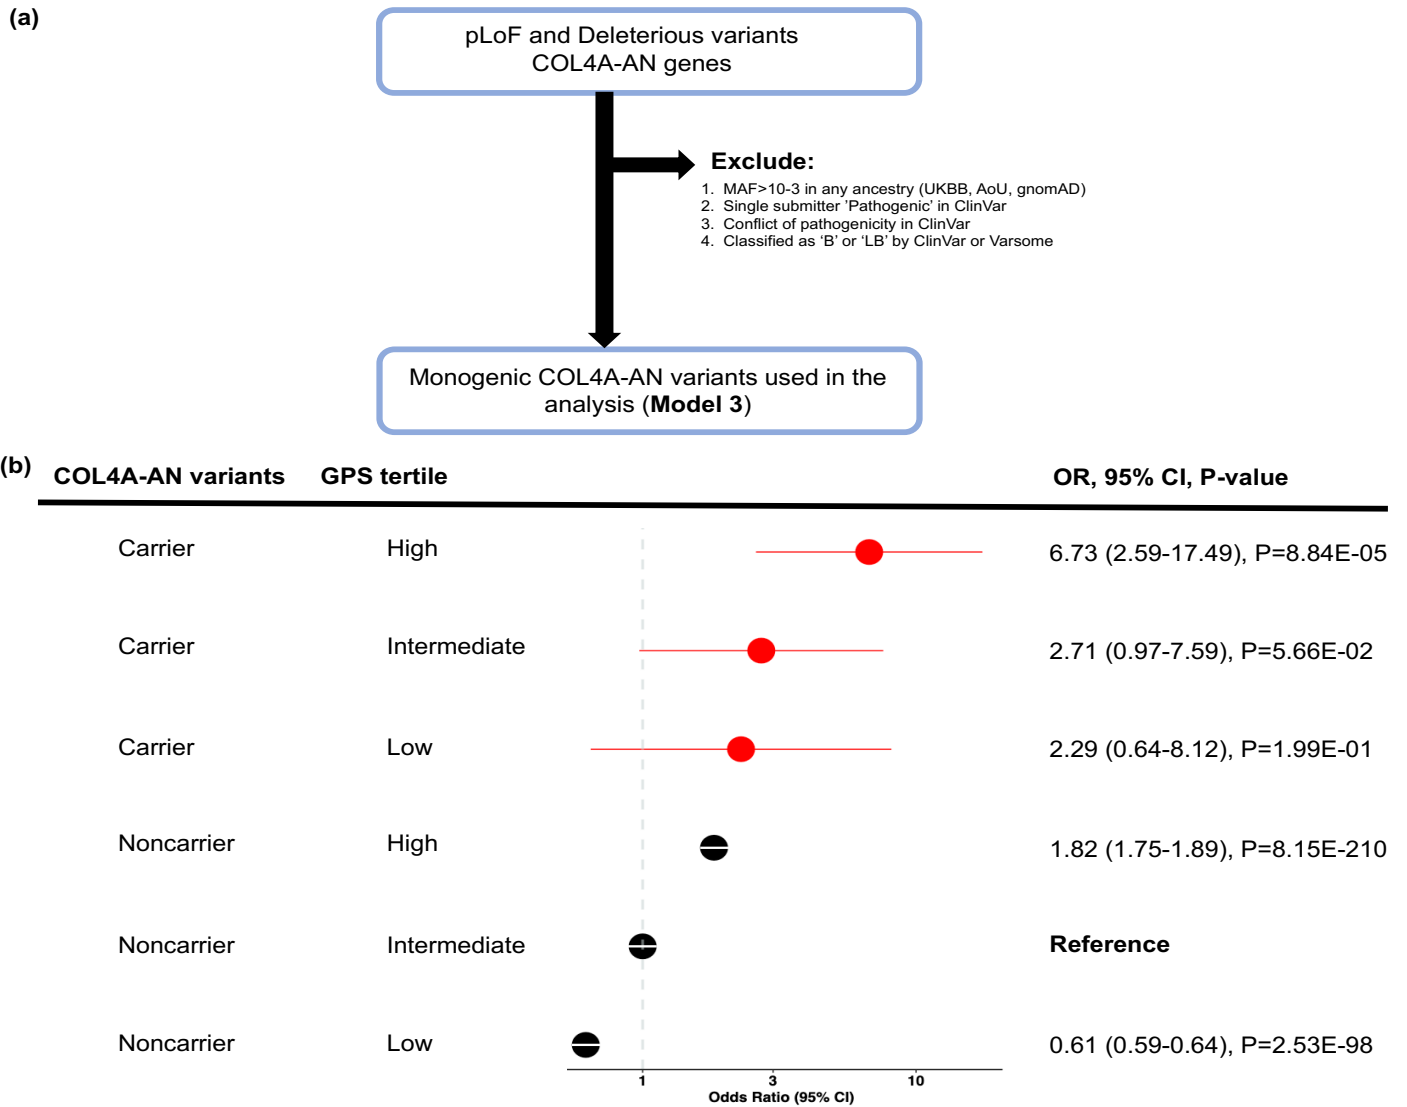

Supplementary Figure 5. Polygenic effects on the risk of CKD among biallelic carriers of COL4A-AN M3 variants (recessive model): (a) M3 qualifying variant filtering strategy; (b) CKD risk for each polygenic risk score tertile compared to the middle tertile in non-carriers (average population risk). The analysis includes N=262,435 UKBB participants (N<sub>cases</sub>=9,565 and N<sub>controls</sub>=252,870) and N=34,603 AoU participants (N<sub>cases</sub>=11,830 and N<sub>controls</sub>=22,773). The non-carriers with intermediate polygenic score (middle tertile) served as the reference group for all calculations. The X-axis shows odds ratios; the dotted vertical line corresponds to the OR=1.0 (no change in risk compared to the reference). The circles correspond to estimated ORs, and the horizontal lines around the circles indicate the 95% confidence intervals (95% CIs). The ORs were estimated using logistic regression model adjusted for age, sex, batch, and ancestry; these estimates were meta-analyzed between AoU and UKBB datasets using fixed effects meta-analysis. Two-sided P-values were derived from fixed effects meta-analysis and were not adjusted for multiple testing.

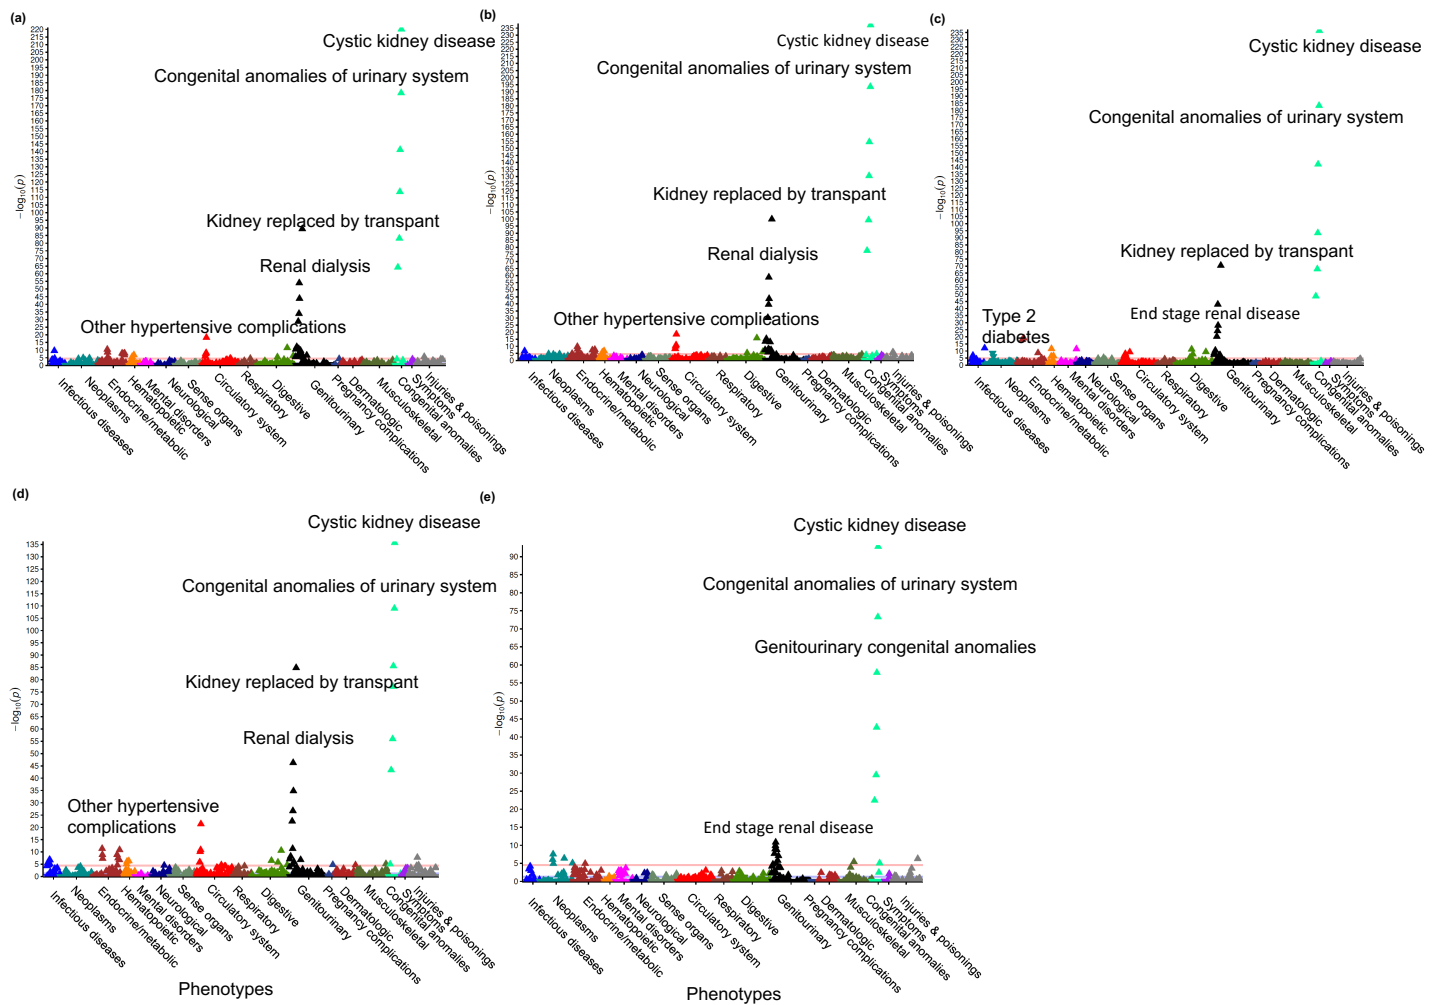

Supplementary Figure 6: ADPKD PheWAS sensitivity analyses in European UKBB participants: (a) M1 model ( $N_{\text{carriers}}=136, N_{\text{non-carriers}}=416,898$ ), (b) M2 model ( $N_{\text{carriers}}=140, N_{\text{non-carriers}}=416,898$ ), (c) M3 model ( $N_{\text{carriers}}=335, N_{\text{non-carriers}}=416,709$ ) (d) *PKD1* gene M1 model ( $N_{\text{carriers}}=81, N_{\text{non-carriers}}=416,898$ ), and (e) *PKD2* gene M1 model ( $N_{\text{carriers}}=55, N_{\text{non-carriers}}=416,898$ ). All analyses were conducted using logistic regression under a dominant model with adjustment for age, sex, batch, and genetic ancestry. The red horizontal lines indicate a phenome-wide significance level after accounting for the number of phecodes tested ( $P=2.8E-05$ ). Y-axis:  $-\log_{10}(P\text{-value})$ . Logistic regression Wald test P-values are two-sided and not adjusted for multiple testing. X-axis: system-based phecode groupings. An upward-pointing triangle indicates increased odds for a given phecode, and a downward-pointing triangle indicates reduced risk.

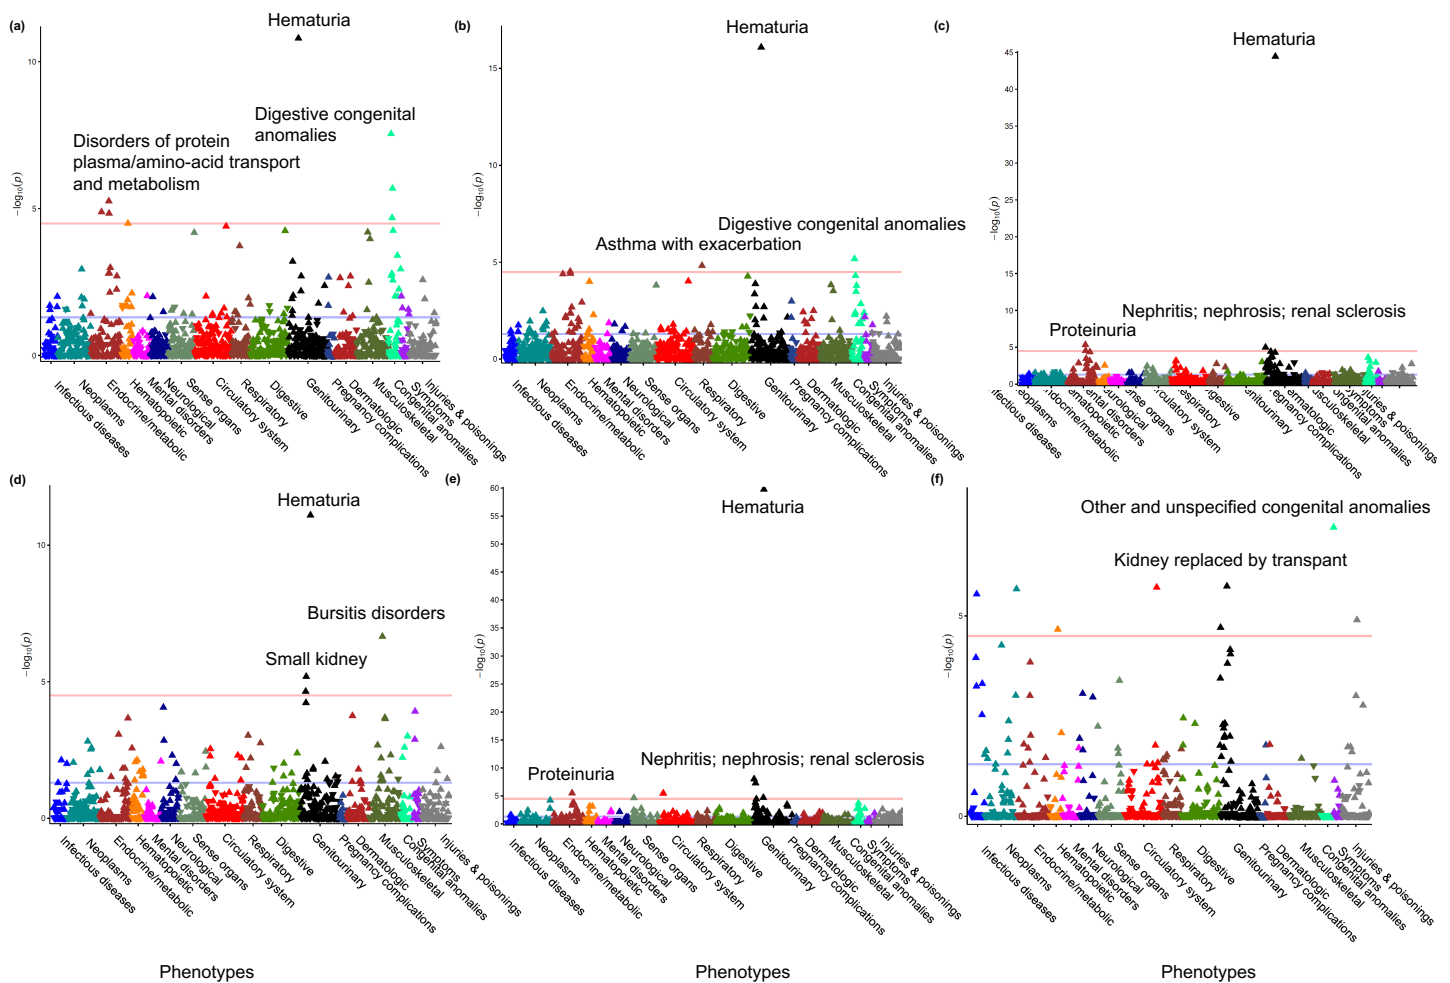

Supplementary Figure 7: COL4A-AN PheWAS Sensitivity Analyses in European UKBB participants: (a) M1 model ( $N_{\text{carriers}}=862, N_{\text{non-carriers}}=418,068$ ), (b) M2 model ( $N_{\text{carriers}}=1,008, N_{\text{non-carriers}}=418,020$ ), (c) M3 model ( $N_{\text{carriers}}=2,921, N_{\text{non-carriers}}=413,938$ ) (d) *COL4A3* gene M1 model ( $N_{\text{carriers}}=270, N_{\text{non-carriers}}=417,662$ ), (e) *COL4A4* gene M1 model ( $N_{\text{carriers}}=505, N_{\text{non-carriers}}=417,662$ ) and (f) *COL4A5* gene M1 model ( $N_{\text{carriers}}=46, N_{\text{non-carriers}}=417,662$ ). All analyses were conducted using logistic regression under a dominant model with adjustment for age, sex, batch, and genetic ancestry. The red horizontal lines indicate a phenome-wide significance level after accounting for the number of phecodes tested ( $P=2.8E-05$ ). Y-axis:  $-\log_{10}(P\text{-value})$ . Logistic regression Wald test P-values are two-sided and not adjusted for multiple testing. X-axis: system-based phecode groupings. An upward-pointing triangle indicates increased odds for a given phecode, and a downward-pointing triangle indicates reduced risk.

Supplementary Table 1: M1, M2, and M3 variant carriers and their characteristics in the UKBB and AoU datasets. The counts include only individuals with a valid phenotype (case/control) label that was included in the analyses. Note that the non-carrier group is common to all three variant models and excludes any M1, M2, and M3 variant carriers.

| Cohorts              | N Total        | N Cases (%)           | N Controls (%)         | Female     | Diabetes   | Mean Age in Years (Range) |
|----------------------|----------------|-----------------------|------------------------|------------|------------|---------------------------|
| <b>UK Biobank</b>    | <b>277,165</b> | <b>10,123 (3.6%)</b>  | <b>267,042 (96.4%)</b> | <b>54%</b> | <b>6%</b>  | <b>56.5 (40-69)</b>       |
| ADPKD M1 Carriers    | 115            | 36 (31.3%)            | 79 (68.7%)             | 60%        | 11%        | 54.6                      |
| ADPKD M2 Carriers    | 125            | 39 (31.2%)            | 86 (68.8%)             | 62%        | 11%        | 53.7                      |
| ADPKD M3 Carriers    | 256            | 45 (17.5%)            | 211 (82.5%)            | 56%        | 7%         | 54.4                      |
| ADPKD Non-carriers   | 264,158        | 9,565 (3.6%)          | 252,870 (96.4%)        | 55%        | 6%         | 54.6                      |
| COL4-AN M1 Carriers  | 1,214          | 62 (5.1%)             | 1,152 (94.9%)          | 55%        | 7%         | 54.9                      |
| COL4-AN M2 Carriers  | 1,350          | 65 (4.8%)             | 1,285 (95.2%)          | 55%        | 7%         | 54.5                      |
| COL4-AN M3 Carriers  | 1,830          | 100 (5.4%)            | 1,730 (94.6%)          | 57%        | 7%         | 54.5                      |
| COL4-AN Non-carriers | 264,239        | 9,646 (3.6%)          | 254,593 (96.4%)        | 54%        | 6%         | 56.5                      |
| <b>All of Us</b>     | <b>34,603</b>  | <b>11,830 (3.41%)</b> | <b>22,773 (96.59%)</b> | <b>60%</b> | <b>11%</b> | <b>54.9 (18-89)</b>       |
| ADPKD M1 Carriers    | 7              | 5 (71.4%)             | 2 (28.6%)              | 71%        | 14%        | 60.5                      |
| ADPKD M2 Carriers    | 14             | 5 (35.7%)             | 9 (64.3%)              | 64%        | 14%        | 59.6                      |
| ADPKD M3 Carriers    | 11             | 7 (63.3%)             | 4 (36.7%)              | 73%        | 27%        | 64.7                      |
| ADPKD Non-carriers   | 34,588         | 11,820 (3.4%)         | 22,768 (96.6%)         | 60%        | 11%        | 54.1                      |
| COL4-AN M1 Carriers  | 78             | 37 (47.4)             | 41 (52.6%)             | 58%        | 23%        | 56.0                      |
| COL4-AN M2 Carriers  | 106            | 47 (44.3%)            | 59 (55.7%)             | 65%        | 21%        | 54.5                      |
| COL4-AN M3 Carriers  | 226            | 72 (31.8%)            | 154 (68.2%)            | 65%        | 20%        | 54.4                      |
| COL4-AN Non-carriers | 34,539         | 11,800 (3.4%)         | 22,739 (96.6%)         | 60%        | 11%        | 54.9                      |

Supplementary Table 2. Imputation of the AoU dataset using phase 3 1000 Genomes project reference panel (all

| Chromosomes | Array SNPs | Imputed SNPs<br>(MAF $\geq$ 0.00 and<br>R $^2$ $\geq$ 0) | Imputed SNPs<br>(MAF=0.001 and<br>R $^2$ =0.30) | Imputed SNPs<br>(MAF=0.001 and<br>R $^2$ =0.80) | Imputed SNPs<br>(MAF=0.01 and<br>R $^2$ =0.80) |
|-------------|------------|----------------------------------------------------------|-------------------------------------------------|-------------------------------------------------|------------------------------------------------|
| 1           | 89688      | 3738240                                                  | 2040921                                         | 1509280                                         | 909349                                         |
| 2           | 99772      | 4057613                                                  | 2231592                                         | 1704713                                         | 1003370                                        |
| 3           | 84384      | 3355939                                                  | 1879863                                         | 1455774                                         | 863987                                         |
| 4           | 76774      | 3338265                                                  | 1899659                                         | 1474223                                         | 876432                                         |
| 5           | 69273      | 3032422                                                  | 1704339                                         | 1320209                                         | 766074                                         |
| 6           | 82492      | 2954410                                                  | 1694019                                         | 1328952                                         | 799683                                         |
| 7           | 63934      | 2753497                                                  | 1539955                                         | 1158989                                         | 694545                                         |
| 8           | 60000      | 2651561                                                  | 1470694                                         | 1135036                                         | 669886                                         |
| 9           | 49556      | 2063096                                                  | 1121854                                         | 842974                                          | 505766                                         |
| 10          | 56241      | 2334090                                                  | 1296803                                         | 986085                                          | 595717                                         |
| 11          | 56476      | 2333242                                                  | 1286023                                         | 978430                                          | 581944                                         |
| 12          | 53025      | 2242720                                                  | 1256253                                         | 945606                                          | 572855                                         |
| 13          | 40542      | 1661700                                                  | 944885                                          | 726461                                          | 434997                                         |
| 14          | 36097      | 1535592                                                  | 841576                                          | 636776                                          | 383314                                         |
| 15          | 35262      | 1404164                                                  | 757414                                          | 555375                                          | 335228                                         |
| 16          | 38698      | 1549316                                                  | 822821                                          | 591403                                          | 358495                                         |
| 17          | 33636      | 1345835                                                  | 721632                                          | 495211                                          | 307640                                         |
| 18          | 33408      | 1319629                                                  | 739218                                          | 551084                                          | 334086                                         |
| 19          | 24882      | 1084535                                                  | 585112                                          | 379198                                          | 247001                                         |
| 20          | 27606      | 1047613                                                  | 577463                                          | 420925                                          | 258119                                         |
| 21          | 16391      | 653791                                                   | 353514                                          | 253922                                          | 159090                                         |
| 22          | 16388      | 652195                                                   | 343797                                          | 234264                                          | 148765                                         |
| Total       | 1,144,525  | 43,371,225                                               | 26,109,407                                      | 19,684,890                                      | 11,806,343                                     |

populations): numbers of variants per chromosome before and after imputation by minor allelic frequency (MAF) and imputation quality (R $^2$ ).

Supplementary Table 3: Genetic ancestry of the AoU dataset based on supervised machine learning with labeled phase 3 1000 Genomes project reference panel for training.

| Ancestry               | N (%)       | Age<br>(Mean in years) | Sex<br>(% Female) |
|------------------------|-------------|------------------------|-------------------|
| EUR (European)         | 94,376 (57) | 58.82                  | 60.03             |
| AFR (African)          | 36,380 (22) | 51.90                  | 57.68             |
| AMR (Admixed American) | 28,807 (17) | 47.73                  | 67.89             |
| EAS (East Asian)       | 3,940 (2)   | 47.04                  | 63.76             |
| SAS (South Asian)      | 1,705 (1)   | 45.76                  | 50.35             |
| Total                  | 165,208     | 50.25                  | 59.94             |

Supplementary Table 4: Overall frequencies of *APOL1* G1 and G2 risk alleles and risk genotypes by ancestry and cohort.

| Dataset     | Ancestry               | APOL1- 1072A>G<br>(rs73885319) | APOL1- 1200T>G<br>(rs60910145) | APOL1-1212- del6<br>(rs71785313) | APOL1 risk<br>genotype (G1G1,<br>G1G2, or G2G2) |
|-------------|------------------------|--------------------------------|--------------------------------|----------------------------------|-------------------------------------------------|
| <b>UKBB</b> |                        |                                |                                |                                  |                                                 |
|             | African (AFR)          | 0.28                           | 0.28                           | 0.15                             | 0.12                                            |
|             | Europeans (EUR)        | 3.75E-05                       | 1.96E-04                       | 2.91E-05                         | <0.01                                           |
| <b>AoU</b>  |                        |                                |                                |                                  |                                                 |
|             | African (AFR)          | 0.233                          | 0.232                          | 0.139                            | 0.12                                            |
|             | Admixed American (AMR) | 0.022                          | 0.022                          | 0.018                            | 0.003                                           |
|             | Europeans (EUR)        | 7.58E-04                       | 7.58E-04                       | 5.19E-04                         | <0.01                                           |

Supplementary Table 5: Genome-wide Polygenic Score (GPS) Re-optimization. The table summarizes associations of candidate polygenic scores with CKD in the UKBB re-optimization dataset (70% of UKBB Europeans after excluding all ADPKD/COL4A-AN qualifying variant carriers). The performance was assessed using logistic regression with GPS as a predictor and case/control status as an outcome. Two-sided P-values were derived for the Wald test of the GPS effect and were not adjusted for multiple testing. Odds ratio (OR) per standard deviation (SD) of each risk score and area under the receiver-operator curve (AUC) were calculated in the UKBB optimization dataset of 175,835 Europeans excluding QV carriers and after adjustment for age, sex, diabetes, first four principal components of ancestry and genotyping batch; AUC crude was calculated for the risk score component alone without any covariates; variance explained is estimated as a Nagelkerke pseudo-R<sup>2</sup> and refers to the variance in case-control status explained by the risk score alone excluding covariate contributions; r<sup>2</sup>: linkage disequilibrium pruning threshold; rho: tuning parameter to model the proportion of variants assumed to be causal; the best performing score is highlighted in bold red.

| Method | Parameter    | N variants | OR* per SD of GPS | P-value     | AUC (Adjusted*) | AUC (Crude) | Variance Explained |
|--------|--------------|------------|-------------------|-------------|-----------------|-------------|--------------------|
| P+T    | P=1.0E-01    | 89,880     | 1.85              | P<1.00E-300 | 0.8392          | 0.6508      | 0.0438             |
| P+T    | P=1.0E-02    | 21,764     | 1.85              | P<1.00E-300 | 0.8399          | 0.6518      | 0.0442             |
| P+T    | P=1.0E-03    | 7,486      | 1.79              | P<1.00E-300 | 0.8380          | 0.6446      | 0.0405             |
| P+T    | P=1.0E-04    | 3,598      | 1.78              | P<1.00E-300 | 0.8374          | 0.6422      | 0.0394             |
| P+T    | P=1.0E-05    | 2,111      | 1.76              | P<1.00E-300 | 0.8366          | 0.6396      | 0.0378             |
| P+T    | P=1.0E-06    | 1,407      | 1.75              | P<1.00E-300 | 0.8365          | 0.6390      | 0.0372             |
| P+T    | P=1.0E-07    | 1,028      | 1.76              | P<1.00E-300 | 0.8362          | 0.6388      | 0.0370             |
| P+T    | P=1.0E-08    | 753        | 1.74              | P<1.00E-300 | 0.8353          | 0.6362      | 0.0355             |
| P+T    | P=3.0E-02    | 41,426     | 1.86              | P<1.00E-300 | 0.8400          | 0.6527      | 0.0450             |
| P+T    | P=3.0E-03    | 11,918     | 1.83              | P<1.00E-300 | 0.8391          | 0.6492      | 0.0428             |
| P+T    | P=3.0E-04    | 4,971      | 1.79              | P<1.00E-300 | 0.8378          | 0.6436      | 0.0401             |
| P+T    | P=3.0E-05    | 2,675      | 1.76              | P<1.00E-300 | 0.8369          | 0.6404      | 0.0385             |
| LDPred | rho=1.0E+00  | 5,440,627  | 1.84              | P<1.00E-300 | 0.8387          | 0.6512      | 0.0433             |
| LDPred | rho =1.0E-01 | 5,440,627  | 1.20              | P=2.60E-44  | 0.8168          | 0.5472      | 0.0039             |
| LDPred | rho =1.0E-02 | 5,440,627  | 1.16              | P=1.03E-28  | 0.8161          | 0.5385      | 0.0025             |
| LDPred | rho =1.0E-03 | 5,440,627  | 1.14              | P=4.78e-24  | 0.8157          | 0.5334      | 0.0020             |
| LDPred | rho =3.0E-01 | 5,440,627  | 1.72              | P<1.00E-300 | 0.8339          | 0.6348      | 0.0342             |
| LDPred | rho =3.0E-02 | 5,440,627  | 1.12              | P=1.05E-18  | 0.8155          | 0.5287      | 0.0016             |
| LDPred | rho =3.0E-03 | 5,440,627  | 1.16              | P=5.98E-31  | 0.8161          | 0.5385      | 0.0027             |

\* Adjusted for age, sex, diabetes, the first four principal ancestry components and genotyping batch.

Supplementary Table 6: The effect of ADPKD qualifying variant (QV) carrier status on the risk of CKD in the UK Biobank and the All of Us datasets. The Odds Ratios (ORs) were derived from logistic regression adjusted for age, sex, diabetes, batch, and genetic ancestry and were combined across both datasets using fixed effects model. Two-sided P-values correspond to the association tests of carrier status as a predictor of CKD (logistic regression Wald test or fixed effects meta-analysis for combined datasets) and are not corrected for multiple testing; M1 includes only pLOF, and ‘P’ variants ( $N_{\text{total}}=122$  carriers); M2 includes pLOF, ‘P’, and ‘LP’ variants ( $N_{\text{total}}=139$  carriers); M3 includes pLOF and all deleterious missense variants as defined by 5 prediction algorithms, Revel  $>0.7$ , and not previously classified as ‘B’ or ‘LB’ by ClinVar ( $N_{\text{total}}=267$  carriers). All comparisons are made in reference to the common group of non-carriers ( $N_{\text{total}}=297,539$ ). CI: Confidence Intervals.

|               | ADPKD M1 carriers<br>OR (95%CI), P | ADPKD M2 carriers<br>OR (95%CI), P | ADPKD M3 carriers<br>OR (95%CI), P |
|---------------|------------------------------------|------------------------------------|------------------------------------|
| UKBB          | 18.2 (11.5-28.6), P=5.1E-36        | 17.3 (11.1-27.0), P=4.8E-36        | 7.1 (4.95-10.2), P=1.8E-26         |
| AoU           | 8.36 (1.84-37.4), P=5.9E-03        | 6.11 (1.47-25.4), P=1.3E-02        | 3.13 (0.70-14.1), P=1.4E-01        |
| Meta-analysis | 17.1 (11.1-26.4), P=1.8E-37        | 15.8 (10.3-24.2), P=5.2E-37        | 6.77 (4.76-9.60), P=1.0E-26        |

Supplementary Table 7: Associations of GPS and ADPKD M1 carrier status with CKD stage 3 or above in the UKBB and All-of-U.s datasets. All analyses were performed using logistic regression and were adjusted for age, sex, diabetes, batch, and genetic ancestry. The estimates from individual cohorts were combined using fixed effects meta-analysis. Two-sided P-values correspond to the logistic regression Wald test (or fixed effects meta-analysis for combined datasets) and are not corrected for multiple testing. NS: not significant.

| Dataset | Cases/controls | CKD GPS<br>OR per SD (95% CI), P | M1 ADPKD carrier<br>OR (95% CI), P | GPS by M1 carrier interaction<br>OR (95% CI), P |
|---------|----------------|----------------------------------|------------------------------------|-------------------------------------------------|
| UKBB    | 10,081/266,724 | 1.80 (1.76-1.84), P<E-300        | 18.2 (11.5-28.6), P=5.08E-36       | 1.43 (0.76-2.72), P=2.68E-01 (NS)               |
| AoU     | 11,820/22,763  | 1.40 (1.36-1.44), P=8.52E-211    | 8.36 (1.8-37.3), 5.8E-03           | 1.04 (0.15-7.03), P=6.68E-01 (NS)               |
| Meta    | 21,901/289,487 | 1.72 (1.69-1.76), P<E-300        | 17.0 (11.0-26.4), P=1.82E-37       | 1.39 (0.76-2.56), P=2.87E-01 (NS)               |

Supplementary Table 8: Genome-wide polygenic score (GPS) performance metrics among ADPKD M1, M2, and M3 carriers and non-carriers. The odds ratios (ORs) were first derived using logistic regression models adjusted for age, sex, diabetes, batch, and genetic ancestry for each individual cohort (UKBB and All-of-U) followed by a fixed-effect meta-analysis of both cohorts. All effect estimates were calculated in reference to the middle tertile of non-carriers (average risk). Two-sided P-values correspond to the fixed effects meta-analysis and are not corrected for multiple testing.

| Model             | Cases/Controls | OR per SD (95% CI), P-value | GPS Tertile | OR (95% CI), P-value         |
|-------------------|----------------|-----------------------------|-------------|------------------------------|
| <b>Noncarrier</b> |                |                             |             |                              |
|                   | 21,901/275,638 | 1.72 (1.69-1.76), P<E-300   | Tertile 1   | 0.62 (0.59-0.65), P=3.9E-96  |
|                   |                |                             | Tertile 2   | Reference                    |
|                   |                |                             | Tertile 3   | 1.82 (1.75-1.89), P=3.4E-208 |
| <b>M1</b>         |                |                             |             |                              |
|                   | 41/81          | 2.28 (1.55-3.37), P=2.7E-05 | Tertile 1   | 3.03 (1.03-8.95), P=4.4E-02  |
|                   |                |                             | Tertile 2   | 35.8 (16.8-76.4), P=2.0E-20  |
|                   |                |                             | Tertile 3   | 54.4 (26.2-113.1), P=9.6E-27 |
| <b>M2</b>         |                |                             |             |                              |
|                   | 44/95          | 2.21 (1.37-3.58), P=3.3E-05 | Tertile 1   | 4.99 (1.94-12.8), P=8.6E-04  |
|                   |                |                             | Tertile 2   | 24.1 (11.5-50.5), P=3.0E-17  |
|                   |                |                             | Tertile 3   | 49.4 (24.0-101.6), P=3.1E-26 |
| <b>M3</b>         |                |                             |             |                              |
|                   | 52/215         | 5.25 (2.31-11.9), P=7.4E-05 | Tertile 1   | 1.89 (0.77-4.63), P=1.6E-01  |
|                   |                |                             | Tertile 2   | 8.52 (4.73-15.3), P=8.8E-13  |
|                   |                |                             | Tertile 3   | 21.8 (12.4-38.1), P=4.7E-27  |

Supplementary Table 9: Sensitivity analyses comparing race-free (2021) vs. race-adjusted (2009) CKD-EPI eGFR equations in the UKBB. GPS effects on the risk of CKD stage 3 or above for (a) ADPKD and (b) COL4A-AN M1 variant carriers. All effect estimates were calculated using logistic regression in reference to the middle tertile of non-carriers (average risk) and were adjusted for age, sex, diabetes, batch, and genetic ancestry. Case-control counts are provided for each analysis as defined by the CKD-EPI 2021 and 2009 equations. Two-sided P-values (logistic regression Wald test) were not corrected for multiple testing.

| Dataset                      | Phenotype                             | Cases/controls | OR (95% CI), P-value        | GPS Tertile | OR (95% CI), P-value         |
|------------------------------|---------------------------------------|----------------|-----------------------------|-------------|------------------------------|
| <b>(a) ADPKD M1 model</b>    |                                       |                |                             |             |                              |
|                              | CKD-EPI 2021 (New) Equation           | 33/86          | 2.43 (1.34-4.39), P=3.3E-03 | Tertile 1   | 4.81 (1.43-16.1), P=1.07E-02 |
|                              |                                       |                |                             | Tertile 2   | 49.9 (23.4-106), P=3.94E-24  |
|                              |                                       |                |                             | Tertile 3   | 64.1 (31.1-132), P=1.53E-29  |
|                              | CKD-EPI 2009 (Race-adjusted) Equation | 36/79          | 2.45 (1.37-4.38), P=2.6E-03 | Tertile 1   | 2.71 (0.78-9.37), P=1.2E-01  |
|                              |                                       |                |                             | Tertile 2   | 40.4 (18.3-89.3), P=5.9E-20  |
|                              |                                       |                |                             | Tertile 3   | 59.7 (28.3-126), P=9.2E-27   |
| <b>(b) COL4A-AN M1 model</b> |                                       |                |                             |             |                              |
|                              | CKD-EPI 2021 (New) Equation           | 43/1,284       | 2.53 (1.52-4.22), P=3.4E-04 | Tertile 1   | 1.38 (0.67-2.84), P=3.8E-01  |
|                              |                                       |                |                             | Tertile 2   | 1.70 (0.86-3.36), P=1.2E-01  |
|                              |                                       |                |                             | Tertile 3   | 2.77 (1.59-4.85), P=3.4E-01  |
|                              | CKD-EPI 2009 (Race-adjusted) Equation | 62/1,152       | 1.93 (1.26-2.95), P=2.3E-03 | Tertile 1   | 1.10 (0.57-2.12), P=7.7E-01  |
|                              |                                       |                |                             | Tertile 2   | 1.45 (0.82-2.55), P=1.9E-01  |
|                              |                                       |                |                             | Tertile 3   | 2.77 (1.73-4.46), P=2.6E-05  |

Supplementary Table 10: Sensitivity analysis of the UKBB participants of European ancestry by eGFR equation. GPS effects on the risk of CKD in the (a) ADPKD and (b) COL4A-AN M1 variant carriers. All effect estimates were calculated using logistic regression in reference to the middle tertile of non-carriers (average risk) and were adjusted for age, sex, diabetes, batch, and genetic ancestry. Case-control counts are provided for each analysis as defined by the CKD-EPI 2021 and 2009 equations. Two-sided P-values (logistic regression Wald test) were not corrected for multiple testing.

| Dataset             | Phenotype                             | Cases/controls | OR (95% CI), P-value        | GPS Tertile | OR (95% CI), P-value        |
|---------------------|---------------------------------------|----------------|-----------------------------|-------------|-----------------------------|
| <b>(A) ADPKD</b>    |                                       |                |                             |             |                             |
|                     | CKD-EPI 2021 (New) Equation           | 28/65          | 2.48 (1.30-4.72), P=5.6E-03 | Tertile 1   | 3.86 (0.89-16.7), P=7.1E-02 |
|                     |                                       |                |                             | Tertile 2   | 58.0 (25.6-131), P=2.3E-22  |
|                     |                                       |                |                             | Tertile 3   | 96.5 (42.7-218), P=4.6E-28  |
|                     | CKD-EPI 2009 (Race-adjusted) Equation | 31/63          | 2.52 (1.35-4.73), P=3.9E-03 | Tertile 1   | 1.82 (0.41-8.02), P=4.3E-01 |
|                     |                                       |                |                             | Tertile 2   | 44.3 (18.8-104), P=4.01E-18 |
|                     |                                       |                |                             | Tertile 3   | 78.3 (32.6-188), P=1.4E-22  |
| <b>(B) COL4A-AN</b> |                                       |                |                             |             |                             |
|                     | CKD-EPI 2021 (New) Equation           | 41/1240        | 2.51 (1.51-4.17), P=4.0E-04 | Tertile 1   | 1.25 (0.58-2.69), P=5.7E-01 |
|                     |                                       |                |                             | Tertile 2   | 1.76 (0.89-3.47), P=1.0E-01 |
|                     |                                       |                |                             | Tertile 3   | 2.64 (1.48-4.71), P=9.8E-04 |
|                     | CKD-EPI 2009 (Race-adjusted) Equation | 60/1109        | 1.94 (1.26-2.98), P=2.7E-03 | Tertile 1   | 1.03 (0.51-2.04), P=9.4E-01 |
|                     |                                       |                |                             | Tertile 2   | 1.47 (0.83-2.59), P=1.8E-01 |
|                     |                                       |                |                             | Tertile 3   | 2.75 (1.69-4.46), P=4.5E-05 |

Supplementary Table 11: The effect of COL4A-AN qualifying variant (QV) carrier status on the risk of CKD in the UKBB and the AoU datasets. All analyses were performed using logistic regression and were adjusted for age, sex, diabetes, batch, and genetic ancestry. The estimates from individual cohorts were combined using fixed effects meta-analysis. Two-sided P-values correspond to the logistic regression Wald test (or fixed effects meta-analysis for combined datasets) and are not corrected for multiple testing; M1 includes only pLOF, and ‘P’ variants ( $N_{\text{total}}=1,292$  carriers); M2 includes pLOF, ‘P’, and ‘LP’ variants ( $N_{\text{total}}=1,458$  carriers); M3 includes pLOF and all deleterious missense variants as defined by 5 prediction algorithms, Revel  $>0.7$ , and not previously classified as ‘B’ or ‘LB’ by ClinVar ( $N_{\text{total}}=2,056$  carriers); M3 recessive model ( $N_{\text{total}}=127$ ) includes biallelic carriers of M3 variants for COL4A3 or COL4A4, or M3 hemizygous males. All comparisons are made in reference to the common group of non-carriers ( $N_{\text{total}}=298,778$ ).

| Datasets | COL4A-AN M1 carriers<br>OR (95%CI), P | COL4A-AN M2 carriers<br>OR (95%CI), P | COL4A-AN M3 carriers<br>OR (95%CI), P | COL4A-AN M3 recessive<br>OR (95%CI), P |
|----------|---------------------------------------|---------------------------------------|---------------------------------------|----------------------------------------|
| UKBB     | 1.41 (1.15-1.74), P=1.1E-03           | 1.34 (1.03-1.73), P=3.0E-02           | 1.55 (1.26-1.92), P=5.0E-05           | 3.10 (1.66-5.78), P=4.2E-04            |
| AoU      | 1.21 (0.82-1.79), P=3.3E-01           | 1.05 (0.67-1.61), P=8.2E-01           | 1.29 (0.90-1.85), P=1.6E-01           | 6.69 (1.23-36.4), P=2.8E-02            |
| Meta     | 1.37 (1.13-1.64), P=8.5E-04           | 1.25 (1.00-1.56), P=4.9E-02           | 1.48 (1.23- 1.77), P=2.6E-05          | 3.38 (1.88-6.08), P=4.7E-05            |

Supplementary Table 12: COL4A-AN status and the GPS for association with CKD stage 3 or above. All analyses were performed using logistic regression and were adjusted for age, sex, diabetes, batch, and genetic ancestry. The estimates from individual cohorts were combined using fixed effects meta-analysis. Two-sided P-values correspond to the logistic regression Wald test (or fixed effects meta-analysis for combined datasets) and are not corrected for multiple testing. NS: not significant.

| Datasets | Cases/controls | CKD GPS<br>OR per SD (95% CI), P | PKD carrier<br>OR (95% CI), P | GPS and COL4A-AN interaction<br>OR (95% CI), P |
|----------|----------------|----------------------------------|-------------------------------|------------------------------------------------|
| UKBB     | 16/156         | 1.80 (1.76-1.84), P< E-300       | 1.41 (1.15-1.74), P=1.10E-03  | 0.98 (0.57-1.70), P=9.40E-01 (NS)              |
| AoU      | 5/06           | 1.40 (1.35-1.44), P=9.18E-85     | 1.21 (0.82-1.79), P=3.32E-01  | 0.77 (0.23-2.62), P=6.81E-01 (NS)              |
| Meta     | 21/162         | 1.78 (1.22-2.58), P=2.38E-03     | 1.37 (1.13-1.64), P=8.52E-04  | 0.94 (0.57-1.55), P=8.12E-01 (NS)              |

Supplementary Table 13. Genome-wide polygenic score (GPS) performance metrics among COL4A-AN M1, M2, and M3 variant carriers and non-carriers. The odds ratios (ORs) were first derived using logistic regression models adjusted for age, sex, diabetes, batch, and genetic ancestry for each individual cohort (UKBB and All-of-U.S) followed by a fixed-effect meta-analysis of both cohorts. All effect estimates were calculated in reference to the middle tertile of non-carriers (average risk). Two-sided P-values correspond to the fixed effects meta-analysis and are not corrected for multiple testing.

| Model                 | Cases/Controls | OR per SD (95% CI), P-value | GPS Tertile | OR (95% CI), P-value         |
|-----------------------|----------------|-----------------------------|-------------|------------------------------|
| <b>Noncarrier</b>     |                |                             |             |                              |
|                       | 21,446/277,332 | 1.70 (1.68-1.73), P<E-300   | Tertile 1   | 0.61 (0.59-0.64), P=2.5E-98  |
|                       |                |                             | Tertile 2   | Reference                    |
|                       |                |                             | Tertile 3   | 1.82 (1.75-1.89), P=8.1E-210 |
| <b>M1</b>             |                |                             |             |                              |
|                       | 99/1,193       | 1.78 (1.22-2.58), P=2.4E-03 | Tertile 1   | 1.08 (0.63-1.86), P=7.7E-01  |
|                       |                |                             | Tertile 2   | 1.66 (1.03-2.68), P=3.7E-02  |
|                       |                |                             | Tertile 3   | 2.53 (1.66-3.85), P=1.4E-05  |
| <b>M2</b>             |                |                             |             |                              |
|                       | 112/1,344      | 2.47 (1.56-3.94), P=1.3E-04 | Tertile 1   | 0.66 (0.40-1.07), P=9.6E-02  |
|                       |                |                             | Tertile 2   | 1.26 (0.84-1.88), P=5.3E-01  |
|                       |                |                             | Tertile 3   | 2.55 (1.83-3.56), P=3.1E-08  |
| <b>M3</b>             |                |                             |             |                              |
|                       | 172/1,884      | 1.93 (1.26-2.95), P=2.3E-03 | Tertile 1   | 1.10 (0.57-2.12), P=7.7E-01  |
|                       |                |                             | Tertile 2   | 1.45 (0.82-2.55), P=2.0E-01  |
|                       |                |                             | Tertile 3   | 2.77 (1.73-4.46), P=2.7E-05  |
| <b>M3 (recessive)</b> |                |                             |             |                              |
|                       | 21/106         | 1.19 (0.69-2.07), P=5.2E-01 | Tertile 1   | 2.29 (0.64-8.12), P=2.0E-01  |
|                       |                |                             | Tertile 2   | 2.71 (0.97-7.59), P=5.6E-02  |
|                       |                |                             | Tertile 3   | 6.73 (2.59-17.5), P=8.8E-05  |

Supplementary Table 14: Genome-wide polygenic score (GPS) effect estimates for each *COL4A* gene under the M1 model. The odds ratios (ORs) were first derived using logistic regression models adjusted for age, sex, diabetes, batch, and genetic ancestry. Only UKBB data was included due to low case counts in the AoU dataset. The P-values (logistic regression Wald test) were two-sided and not adjusted for multiple testing.

| Gene               | Cases/controls | OR per SD (95% CI), P-value  | GPS Tertile | OR (95% CI), P-value                 |
|--------------------|----------------|------------------------------|-------------|--------------------------------------|
| <i>COL4A3</i>      | 12/211         | 1.37 (0.60-3.14), P=4.5E-01  | Tertile 1   | 1.70 (0.65-4.43), P=2.8E-01          |
|                    |                |                              | Tertile 2   | 1.20 (0.36-3.98), P=7.7E-01          |
|                    |                |                              | Tertile 3   | 2.00 (0.70-5.72), P=1.9E-01          |
| <i>COL4A4</i>      | 16/313         | 1.49 (0.73-3.03), P=2.7E-01  | Tertile 1   | 0.86 (0.264-2.78), P=7.9E-01         |
|                    |                |                              | Tertile 2   | 1.69 (0.70-4.05), P=2.3E-01          |
|                    |                |                              | Tertile 3   | 2.23 (0.98-5.06), P=5.6E-02          |
| <i>COL4A3 or 4</i> | 28/524         | 1.91 (0.90-4.09), P=9.3E-02  | Tertile 1   | 0.94 (0.41-2.18), P=8.8E-01          |
|                    |                |                              | Tertile 2   | 1.54 (0.78-3.02), P=2.1E-01          |
|                    |                |                              | Tertile 3   | 2.43 (1.31-4.52), P=5.0E-03          |
| <i>COL4A5</i>      | 3/32           | 1.97 (0.18-21.10), P=5.7E-01 | Tertile 1   | 3.46 (0.40-29.8), P=2.5E-01          |
|                    |                |                              | Tertile 2   | 1.35E-04 (2.6E-82-7.0E73), P=9.2E-01 |
|                    |                |                              | Tertile 3   | 11.0 (2.02-60.2), P=5.6E-03          |
